# Supplementary material for: Proteomics of Homeobox7 Enhanced Salt Tolerance in Mesembryanthemum crystallinum
Source: MDPI journal article supplement (doi:10.3390/ijms22126390), 2021-06-15
Supplement: s1 [file s1]

# Proteomics of Homeobox7 Enhanced Salt Tolerance in *Mesembryanthemum crystallinum*

Xuemei Zhang <sup>1,2</sup>, Bowen Tan <sup>2</sup>, Dan Zhu <sup>2,3</sup>, Daniel Dufresne <sup>4</sup>, Tingbo Jiang <sup>1,\*</sup> and Sixue Chen <sup>2,5,6,\*</sup>

<sup>1</sup> State Key Laboratory of Tree Genetics and Breeding, Northeast Forestry University, Harbin 150040, China; zhangxuemei199111@gmail.com

<sup>2</sup> Department of Biology, Genetics Institute, University of Florida, Gainesville, FL 32610, USA; tanbowen@ufl.edu (B.T.); zhudan2014dora@163.com (D.Z.)

<sup>3</sup> College of Life Sciences, Qingdao Agricultural University, Qingdao 266109, China

<sup>4</sup> Department of Chemistry, Florida Atlantic University, Boca Raton, FL 33431, USA; dufresne71@yahoo.com

<sup>5</sup> Plant Molecular and Cellular Biology Program, University of Florida, Gainesville, FL 32610, USA

<sup>6</sup> Proteomics and Mass Spectrometry, Interdisciplinary Center for Biotechnology Research, University of Florida, Gainesville, FL 32610, USA

\* Correspondence: tbjiang@yahoo.com (T.J.); schen@ufl.edu (S.C.)

## Supplementary data

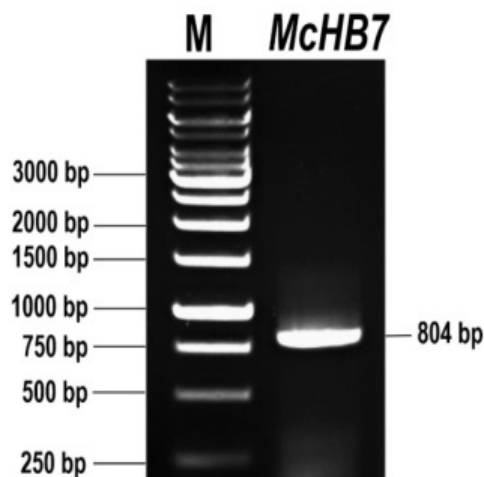

**Figure S1** Cloning *McHB7* from ice plant leaves

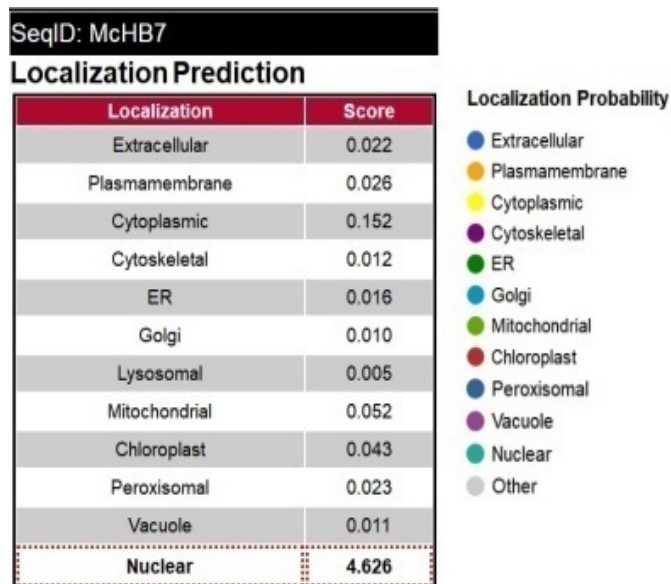

Figure S2 Subcellular localization prediction with CELLO2GO

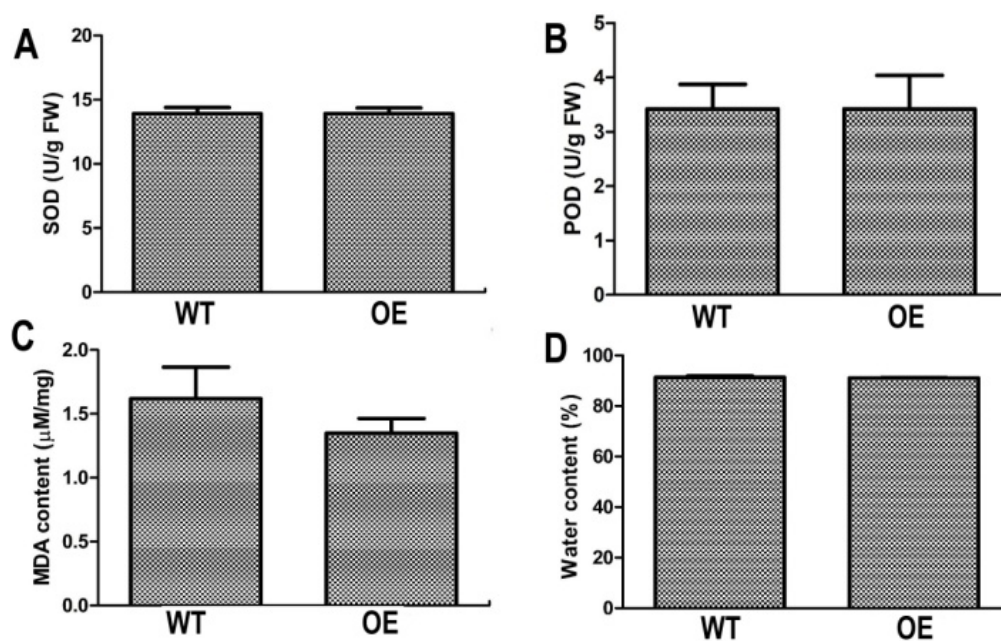

Figure S3 Physiological parameters in OE ice plant. (A) SOD activity of OE and WT ice plants. (B) POD activity. (C) MDA content. (D) Water content.

**A** OEC/WTC

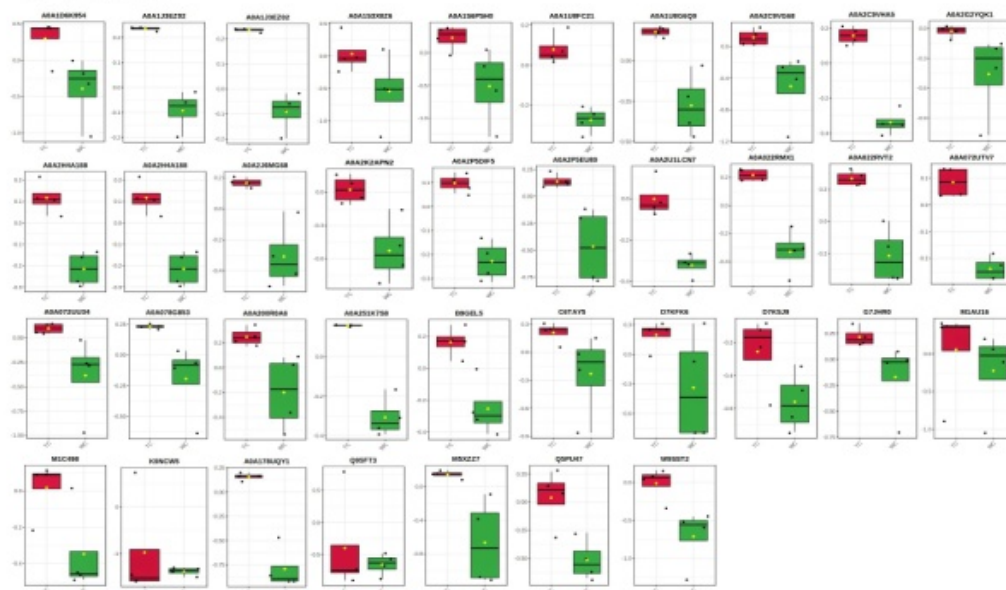

**B** OES/WTs

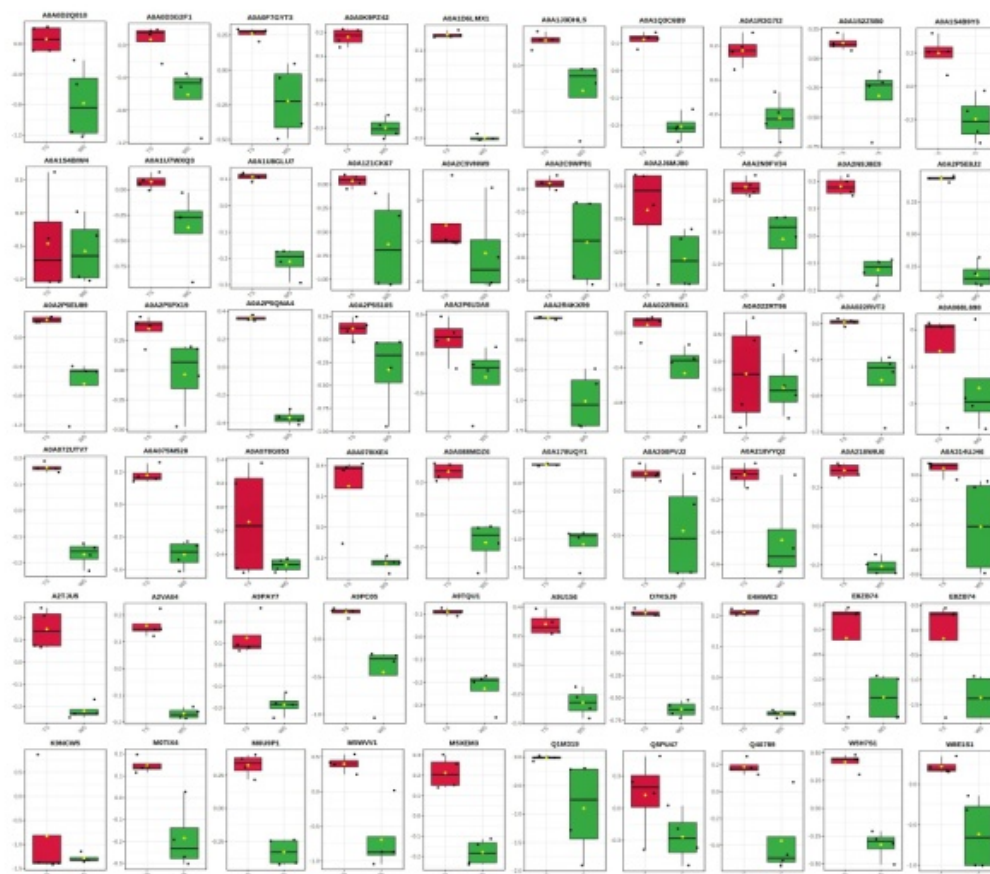

**Figure S4** Significantly increased proteins in transgenic ice plant leaves under control and salt stress treatment. **(A)** Increased proteins under control conditions. **(B)** Increased proteins under salt stress conditions

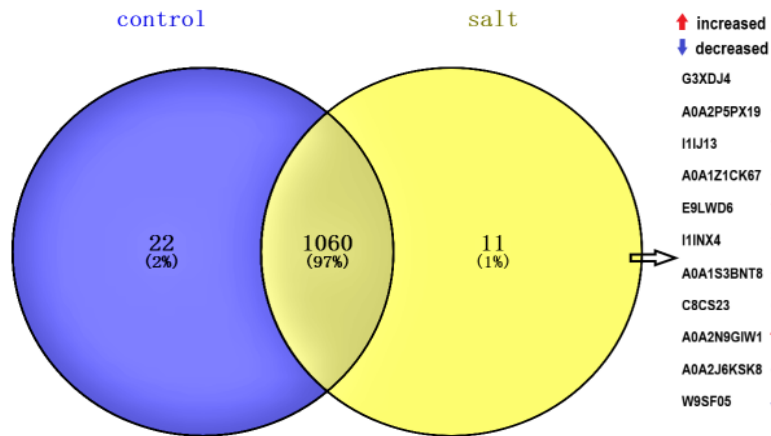

Figure S5 Identified proteins under control and salt stress conditions.

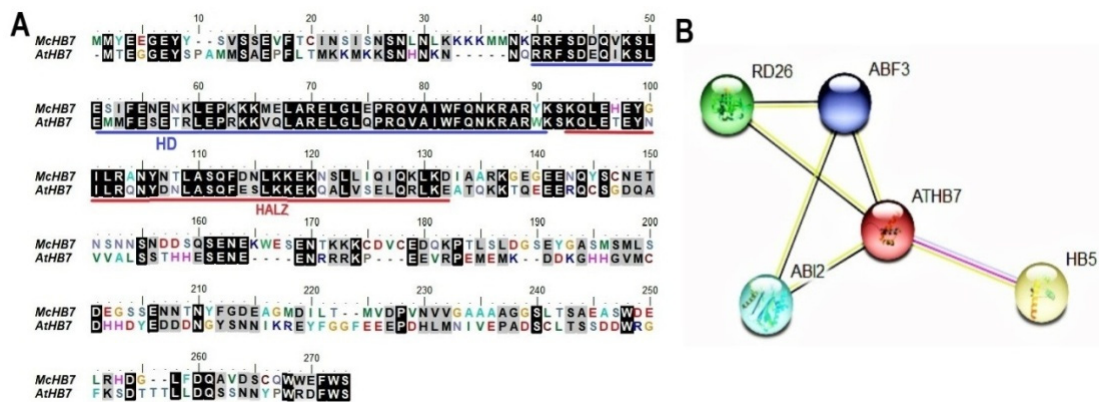

Figure S6 Alignment with *AtHB7* and *McHB7*. (A) Alignment of *AtHB7* and *McHB7*. (B) Protein-protein interaction network of *AtHB7*.

Table S1. List of primers sequences for cloning and quantitative real-time PCR

| Gene name       | Primer sequence(5'-3')                                                                                                                                                           |
|-----------------|----------------------------------------------------------------------------------------------------------------------------------------------------------------------------------|
| <b>cMcHB7</b>   | F: ATGATGTATGAAGAAGGAGAA<br>R: TCACGACCAAAATTTCCACCA                                                                                                                             |
| <b>gMcHB7</b>   | F: CGCCCATGGATGATGTATGAAGAAGGAGAA<br>R: CGGACTAGT CGACCAAAATTTCCACCATTG                                                                                                          |
| <b>McPIP1;2</b> | F: GATGCCAAGAGGAGTGCTAG<br>R: GTTCCAGTGATTGGGATGGTT                                                                                                                              |
| <b>rtMcHB7</b>  | F: CGAGACGAACAGCAATAATAGT<br>R: CTTCACACACATCGCATTCT                                                                                                                             |
| <b>pMcHB7</b>   | F: CGCGGATCCATGATGTATGAAGAAGGAGAA<br>R:CGGTCTAGATCAGGCGCCTTTGTCATCGTCATCCTTGTAGTCTCCGCC<br>TTTATCGTCATCGTCTTTATAATCTCCGCCTTTGTCATCGTCATCCTTGTA<br>GTCTCCGCCCGACCAAAATTTCCACCATTG |

cMcHB7 was the primer for *McHB7* gene cloning; gMcHB7 was the primer for GFP ligation, the underlines were *NcoI* and *Spe I* restriction sites, respectively; McPIP1;2 was the internal primer for RT-qPCR; rtMcHB7 was the primer for *McHB7* quantification using RT-qPCR; and pMcHB7 was the primer for overexpression vector construction, the underlines were *Bam HI* and *XbaI*, respectively.

**Table S2** Posphorylated proteins

| Accession  | Description                                                                                                             | Peptides | Unique Peptides |
|------------|-------------------------------------------------------------------------------------------------------------------------|----------|-----------------|
| Q40185     | Chlorophyll a-b binding protein                                                                                         | 4        | 2               |
| A0A022RT96 | Chlorophyll a-b binding protein                                                                                         | 6        | 2               |
| A0A078II53 | Glutamine synthetase                                                                                                    | 3        | 2               |
| A0A1D8DAB1 | Ribulose biphosphate carboxylase large chain                                                                            | 2        | 2               |
| A0A0A0QMA2 | Ribulose biphosphate carboxylase large chain                                                                            | 3        | 3               |
| B8BPB7     | Uncharacterized protein                                                                                                 | 3        | 2               |
| A0A1S4CJP2 | ribulose biphosphate carboxylase/oxygenase activase 1, chloroplastic isoform X1                                         | 10       | 2               |
| A0A087H1T9 | Glutamine synthetase                                                                                                    | 2        | 2               |
| A0A2R6XLV7 | Uncharacterized protein                                                                                                 | 8        | 2               |
| K4AXU0     | Uncharacterized protein                                                                                                 | 13       | 2               |
| A0A1Y0KLB7 | Ribulose biphosphate carboxylase large chain                                                                            | 3        | 2               |
| A0A2P6U3A8 | Rubisco activase                                                                                                        | 3        | 2               |
| Q2HW53     | Ferredoxin-dependent glutamate synthase; Glutamate synthase, large subunit region 1 and 3, putative; Glutamate synthase | 14       | 2               |
| I3SU63     | Fructose-bisphosphate aldolase                                                                                          | 3        | 2               |
| B9HKC1     | Uncharacterized protein                                                                                                 | 4        | 3               |
| A0A2P5AJP3 | Chlorophyll a-b binding protein                                                                                         | 6        | 2               |
| A0A1S4BC47 | Chlorophyll a-b binding protein                                                                                         | 5        | 3               |
| M7YTH1     | Chlorophyll a-b binding protein                                                                                         | 8        | 2               |
| Q41423     | Chlorophyll a-b binding protein                                                                                         | 5        | 2               |
| A0A2P5DIF5 | Chlorophyll a-b binding protein                                                                                         | 6        | 4               |
| Q9TKH0     | Ribulose biphosphate carboxylase large chain                                                                            | 3        | 2               |
| A0A0S2LMW5 | ATP synthase subunit beta                                                                                               | 2        | 2               |
| W1P4U4     | Chlorophyll a-b binding protein                                                                                         | 8        | 2               |
| A0A178VDH1 | CSP41A OS=Arabidopsis thaliana                                                                                          | 4        | 2               |
| M5X4I0     | Malate dehydrogenase                                                                                                    | 6        | 2               |
| K3YTH6     | Uncharacterized protein                                                                                                 | 2        | 2               |
| G0WYB2     | Ribulose biphosphate carboxylase large chain                                                                            | 2        | 2               |
| A0A0B5H5B4 | Ribulose biphosphate carboxylase large chain                                                                            | 3        | 2               |
| A0A1U8G7Q4 | phosphoglucomutase                                                                                                      | 9        | 3               |
| C5IFT7     | Chlorophyll a-b binding protein                                                                                         | 5        | 3               |
| A0A218W3S5 | Uncharacterized protein                                                                                                 | 6        | 2               |
| B9HRB0     | Uncharacterized protein                                                                                                 | 3        | 2               |
| A0A2N9J3G3 | Chlorophyll a-b binding protein                                                                                         | 5        | 2               |
| M1AAF6     | Uncharacterized protein                                                                                                 | 4        | 4               |

**Table S3** *Cis*-acting elements in the upstream promoter of *AtHB7*

| site name                 | sequence        | function                                                                    |
|---------------------------|-----------------|-----------------------------------------------------------------------------|
| <b>MBS</b>                | CAACTG          | MYB binding site involved in drought-inducibility                           |
| <b>as-1</b>               | TGACG           | an Oxidative Stress-Responsive Element                                      |
| <b>WUN-motif</b>          | AAATTTCCT       | wound-responsive element                                                    |
| <b>ABRE</b>               | ACGTG           | involved in the abscisic acid responsiveness                                |
| <b>GARE-motif</b>         | TCTGTTG         | gibberellin-responsive element                                              |
| <b>LAMP-element</b>       | CTTTATCA        | part of a light responsive element                                          |
| <b>MRE</b>                | AACCTAA         | MYB binding site involved in light responsiveness                           |
| <b>GCN4_motif</b>         | TGAGTCA         | involved in endosperm expression                                            |
| <b>CCAAT-box</b>          | CAACGG          | MYBHv1 binding site                                                         |
| <b>ACE</b>                | CTAACGTATT      | involved in light responsiveness                                            |
| <b>TGACG-motif</b>        | TGACG           | involved in the MeJA-responsiveness                                         |
| <b>GATA-motif</b>         | AAGATAAGATT     | part of a light responsive element                                          |
| <b>GT1-motif</b>          | GGTTAA          | light responsive element                                                    |
| <b>ARE</b>                | AAACCA          | <i>cis</i> -acting regulatory element essential for the anaerobic induction |
| <b>TC-rich repeats</b>    | ATTCTCTAAC      | defense and stress responsiveness                                           |
| <b>P-box</b>              | CCTTTTG         | gibberellin-responsive element                                              |
| <b>LTR</b>                | CCGAAA          | low-temperature responsiveness                                              |
| <b>TATC-box</b>           | TATCCCA         | gibberellin-responsiveness                                                  |
| <b>CAT-box</b>            | GCCACT          | related to meristem expression                                              |
| <b>3-AF1 binding site</b> | TAAGAGAGGA<br>A | light responsive element                                                    |
| <b>TCT-motif</b>          | TCTTAC          | part of a light responsive element                                          |
| <b>G-box</b>              | TAACACGTAG      | involved in light responsiveness                                            |
| <b>TCA-element</b>        | CCATCTTTTT      | involved in salicylic acid responsiveness                                   |
| <b>Box 4</b>              | ATTAAT          | part of a conserved DNA module involved in light responsiveness             |
| <b>O2-site</b>            | GATGATGTGG      | involved in zein metabolism regulation                                      |
| <b>Sp1</b>                | GGGCGG          | light responsive element                                                    |
| <b>GA-motif</b>           | ATAGATAA        | part of a light responsive element                                          |
| <b>CGTCA-motif</b>        | CGTCA           | involved in the MeJA-responsiveness                                         |
| <b>AE-box</b>             | AGAAACAA        | part of a module for light response                                         |
| <b>chs-CMA1a</b>          | TTACTTAA        | part of a light responsive element                                          |
| <b>Box II</b>             | ACACGTAGA       | part of a light responsive element                                          |
